# Supplementary material for: Population Genomics: Whole-Genome Analysis of Polymorphism and Divergence in Drosophila simulans
Source: PLOS journal article supplement (doi:10.1371/journal.pbio.0050310), 2007-10-30
Supplement: S5 (10.1371/journal.pbio.0050310.s005) [file journal.pbio.0050310.s005]

Table S5. Spearman correlations of nucleotide heterozygosity, nucleotide divergence, relative rate 2 tests, ancestral GC content and *D. simulans* transposable element density (all measured in 50 kb windows) vs. proximal-distal location along chromosome arms. Positive correlations for 2L, 3L and X, and negative correlations for 2R and 3R indicate increasing values closer to centromeres. Inv3R was used for *D. simulans* lineage inferences. Trimmed data indicates analyses for which regions of low heterozygosity were removed (Methods).

*D. simulans* divergence

X 0.18**

2L 0.24***

2R -0.30***

3L 0.40***

3R -0.47***

*D. simulans* divergence (trimmed)

X 0.05 NS

2L 0.13*

2R -0.29***

3L 0.48***

3R -0.44***

*D. simulans* relative rate 2

X -0.29***

2L 0.01 NS

2R -0.04 NS

3L 0.19***

3R -0.14*

*D. simulans* relative rate 2 (trimmed)

X -0.20***

2L 0.03 NS

2R -0.05 NS

3L 0.13*

3R -0.09*

*D. simulans* nucleotide heterozygosity

X 0.32***

2L -0.02 NS

2R -0.19**

3L 0.26***

3R -0.17***

*D. simulans* nucleotide heterozygosity (trimmed)

X 0.08 NS

2L -0.02 NS

2R -0.19**

3L 0.43***

3R -0.17***

Inferred ancestral GC content

X -0.10 NS

2L -0.36***

2R 0.06 NS

3L -0.19***

3R 0.24***

Inferred ancestral GC composition (trimmed)

X 0.08 NS

2L -0.26***

2R -0.20**

3L -0.26***

3R 0.22***

TE density

X -0.620,10-14

X* -0.623,10-14

2L +0.175,0.08

2R -0.309, 0.003

3L +0.079, 0.4

3L* +0.119,0.23

3R -0.404,10-5

*Outlier windows removed, 2 for *3L* and 4 for *X*.

*D. melanogaster* divergence

X 0.01 NS

2L 0.09 NS

2R -0.13*

3L 0.34***

3R -0.38***

*D. melanogaster* divergence (trimmed)

X -0.08 NS

2L 0.03 NS

2R -0.18**

3L 0.26***

3R -0.35****

*D. melanogaster* relative rate 2

X -0.20***

2L 0.09 NS

2R -0.06 NS

3L 0.02 NS

3R -0.03 NS

*D. melanogaster* relative rate 2 (trimmed)

X -0.20***

2L 0.00 NS

2R -0.11*

3L -0.12*

3R -0.06 NS

*** p < 0.0001

** p <0.001

* p < 0.05

NS = not significant
