# Supplementary material for: Population Genomics: Whole-Genome Analysis of Polymorphism and Divergence in Drosophila simulans
Source: PLOS journal article supplement (doi:10.1371/journal.pbio.0050310), 2007-10-30
Supplement: S18 (10.1371/journal.pbio.0050310.s018) [file journal.pbio.0050310.s018]

Table S18. Genes having the greatest relative rate test 2 test statistics for dN in the *D. simulans* lineage

Gene 2 sim dN mel dN Name Cellular Component Molecular Function Biological Process

*CG3312-PA* 188.8 0.0918 0.0281 *Rnp4F* intracellular; GO:0005622 mRNA binding; GO:0003729 RNA processing; GO:0006396

*CG2791-PA* 100.8 0.0515 0.0065

*CG17523-PA* 81.9 0.0764 0.0175 *GstE2* glutathione transferase activity; GO:0004364 defense response; GO:0006952

response to toxin; GO:0009636

*CG3491-PA* 81.9 0.05 0.0176 membrane; GO:0016020 DNA binding; GO:0003677 regulation of transcription, DNA-dependent; GO:0006355

nucleus; GO:0005634 nucleic acid binding; GO:0003676 transport; GO:0006810

ATP binding; GO:0005524

helicase activity; GO:0004386

transporter activity; GO:0005215

*CG12717-PA* 64.8 0.1051 0.0407

*CG1826-PA* 56.4 0.0405 0.0104 actin binding; GO:0003779

structural constituent of cytoskeleton; GO:0005200

*CG31219-PA* 52.9 0.1274 0.0567 trypsin activity; GO:0004295

chymotrypsin activity; GO:0004263

monophenol monooxygenase activator activity; GO:0008439 proteolysis; GO:0006508

*CG6352-PA* 52.7 0.1175 0.0334 *OdsH* nucleus; GO:0005634 transcription factor activity; GO:0003700 regulation of transcription; GO:0045449

regulation of transcription from RNA polymerase II promoter; GO:0006357

*CG8834-PA* 52.1 0.0224 0.002 ligase activity; GO:0016874 metabolism; GO:0008152

4-coumarate-CoA ligase activity

*CG15523-PB* 51.8 0.0125 0.0064

*CG8870-PA* 51.5 0.1022 0.0327 nucleus; GO:0005634 DNA binding; GO:0003677 proteolysis; GO:0006508

trypsin activity; GO:0004295 regulation of transcription, DNA-dependent; GO:0006355

chymotrypsin activity; GO:0004263

monophenol monooxygenase activator activity; GO:0008439

transcription factor activity; GO:0003700

*CG13838-PA* 48.8 0.1169 0.0062

*CG4104-PA*  47.0 0.0077 0.0006 *Tps1* alpha,alpha-trehalose-phosphate synthase (UDP-forming) disaccharide metabolism; GO:0005984

activity; GO:0003825 trehalose biosynthesis; GO:0005992

trehalose-phosphatase activity; GO:0004805

*CG3730-PA* 46.1 0.0302 0.0111 *csul* cytoplasm; GO:0005737 protein methyltransferase activity; GO:0008276 MAPKKK cascade; GO:0000165

receptor binding; GO:0005102 mitosis; GO:0007067

pole plasm assembly; GO:0007315

*CG12317-PA* 44.9 0.0226 0.0028 *JhI-21* membrane; GO:0016020 amino acid transporter activity; GO:0015171 amino acid metabolism; GO:0006520

L-amino acid transporter activity; GO:0015179 amino acid transport; GO:0006865

amino acid transporter activity; GO:0015171

amino acid-polyamine transporter activity; GO:0005279

*CG12598-PA* 42.9 0.0127 0 *Adar* intracellular; GO:0005622 double-stranded RNA binding; GO:0003725 RNA editing; GO:0016547

double-stranded RNA adenosine deaminase activity adenosine to inosine editing; GO:0006382

adult behavior; GO:0030534

adult locomotory behavior; GO:0008344

mRNA editing; GO:0006381

mRNA processing; GO:0006397

regulation of membrane potential; GO:0042391

response to heat; GO:0009408

response to hypoxia; GO:0001666

*CG32188* 39.7 0.1271 0.0253

*CG10533* 38.9 0.1525 0.0891 *Lcp65Af* structural constituent of larval cuticle (sensu

Insecta); GO:0008010

*CG31775* 35.4 0.0958 0.018

*CG12590-PA* 33.2 0.0851 0.0198

*CG32743-PA* 32.0 0.0252 0.0186 *Smg1* ATP binding; GO:0005524 intracellular signaling cascade; GO:0007242

receptor signaling protein serine/threonine mRNA catabolism, nonsense-mediated decay; GO:0000184

kinase activity; GO:0004702 phosphorylation; GO:0016310

protein kinase activity; GO:0004672 protein amino acid phosphorylation; GO:0006468

*CG6819* 31.3 0.0239 0.0096 *mbo* nuclear membrane; GO:0005635 transporter activity; GO:0005215 antimicrobial humoral response (sensu Protostomia); GO:0006960

nuclear pore; GO:0005643 protein binding; GO:0005515 immune response; GO:0006955

negative regulation of protein export from nucleus; GO:0046826

protein import into nucleus; GO:0006606

protein targeting; GO:0006605

tracheal branch fusion; GO:0035147

tracheal system development (sensu Insecta); GO:0007424

*CG10478-PA* 30.7 0.0611 0.0198 nuclear pore; GO:0005643 protein carrier activity; GO:0008320 protein import into nucleus; GO:0006606

*CG7046* 30.4 0.1072 0.0373 chromatin; GO:0000785 DNA binding; GO:0003677 regulation of transcription, DNA-dependent; GO:0006355

nucleus; GO:0005634

*CG5999* 29.3 0.0296 0.0074 glucuronosyltransferase activity; GO:0015020 defense response; GO:0006952
