# Supplementary material for: Population Genomics: Whole-Genome Analysis of Polymorphism and Divergence in Drosophila simulans
Source: PLOS journal article supplement (doi:10.1371/journal.pbio.0050310), 2007-10-30
Supplement: S22 (10.1371/journal.pbio.0050310.s022) [file journal.pbio.0050310.s022]

Table S22. Genes associated with the most-significant 5’UTR polarized MK tests (average coverage per site > 2)

UTR Synonymous

_________ _________

Gene Name Poly Fix Poly Fix FET Cell. Compo. Mol. Function Biol. Process

________ _____ ___ ___ ___ ___ _____ __________________________ _____________________________________________ ______________________________________

*CG9279*  8 38 50 21 1.8e-8 dynactin complex GO:0005869 structural constituent of cytoskeleton GO:0005200 intracellular protein transport GO:0006886

microtubule motor activity GO:0003777 microtubule based movement GO:0007018

Vesicle-mediated transport GO:0016192

*CG5518* *sda* 7 11 64 11 0.00014 zinc ion binding; GO:0008270 mechanosensory behavior; GO:0007638

membrane alanyl aminopeptidase activity; GO:0004179 proteolysis; GO:0006508

response to mechanical stimulus; GO:0009612

*CG13396* *fy* 0 8 29 12 0.00028 establishment and/or maintenance of cell polarity

GO:0007163

establishment of planar polarity; GO:0001736

establishment of wing hair orientation; GO:0001737

*CG8590* *Klp3A* 2 31 17 22 0.00035 aster; GO:0005818 microtubule binding; GO:0008017 chromosome segregation; GO:0007059

*mei-352* central plaque of spindle pole body; ATP binding; GO:0005524 cytokinesis; GO:0000910

GO:0005823 structural constituent of cytoskeleton; GO:0005200 fertilization (sensu Metazoa); GO:0007338

cytoplasm; GO:0005737 microtubule motor activity; GO:0003777 male meiosis; GO:0007140

intermediate layer of spindle plus-end-directed microtubule motor activity; GO:0008574 microtubule-based movement; GO:0007018 pole body; GO:0005821 mitosis; GO:0007067

kinesin complex; GO:0005871 mitotic spindle organization and biogenesis; GO:0007052

microtubule associated complex; pronuclear fusion; GO:0007344

GO:0005875 protein targeting; GO:0006605

midbody; GO:0030496 regulation of mitosis; GO:0007088

nucleus; GO:0005634 spindle elongation; GO:0051231

spindle; GO:0005819 spindle pole body separation; GO:0000073

*CG18608* *prod* 1 7 16 2 0.00040 chromosome; GO:0005694 chromatin binding; GO:0003682 lymph gland development (sensu Arthropoda);

chromosome, pericentric region; GO:0048542

GO:0000775

heterochromatin; GO:0000792

*CG10062*  4 6 59 5 0.00040

*CG6005* 2 7 20 2 0.00042

*CG18522*  2 6 70 11 0.00047 oxidoreductase activity; GO:0016491 defense response; GO:0006952

electron transporter activity; GO:0005489 electron transport; GO:0006118

nucleobase, nucleoside, nucleotide and nucleic acid metabolism; GO:0006139

oxygen and reactive oxygen species metabolism;

GO:0006800

*CG7035* *Cbp80* 0 14 17 16 0.00058 nucleus; GO:0005634 RNA cap binding; GO:0000339 nuclear mRNA splicing, via spliceosome; snRNA cap binding complex; GO:0000398

GO:0005846 protein biosynthesis; GO:0006412

spliceosome complex; GO:0005681

*CG4272* 3 13 28 12 0.00080
