# Supplementary material for: Population Genomics: Whole-Genome Analysis of Polymorphism and Divergence in Drosophila simulans
Source: PLOS journal article supplement (doi:10.1371/journal.pbio.0050310), 2007-10-30
Supplement: S23 (10.1371/journal.pbio.0050310.s023) [file journal.pbio.0050310.s023]

Table S23. Genes associated with the most-significant 3’UTR polarized MK tests (average coverage per site > 2)

UTR Synonymous

_________ _________

Gene Name Poly Fix Poly Fix FET p-value Cell. Compo. Mol. Function Biol. Process

________ _____ ____ ___ ___ ___ __________ ____________________________ ____________________________________________ _______________________________________

*CG4107* *Pcaf* 7 17 30 6 0.000035 SAGA complex; GO:0000124 histone acetyltransferase activity; GO:0004402 regulation of transcription from RNA polymerase

polytene chromosome; GO:0005700 II promoter; GO:0006357

*CG6181*  3 12 58 19 0.00008

*CG32099* *eap* 1 6 25 2 0.00014 magnesium ion binding; GO:0000287 fatty acid biosynthesis; GO:0006633

phosphopantetheinyltransferase activity; GO:0008897 protein amino acid phosphopantetheinylation;

GO:0018215

*CG14005*  5 13 17 2 0.00019

*CG12800* *Cyp6d4* 6 10 33 4 0.00023 membrane; GO:0016020 electron transporter activity; GO:0005489 electron transport; GO:0006118

microsome; GO:0005792 oxidoreductase activity; GO:0016491 steroid metabolism; GO:0008202

monooxygenase activity; GO:0004497

*CG6123*  7 23 13 3 0.00038

*CG7347* *mus304* 4 11 38 11 0.00054 cytoplasm; GO:0005737 ATP-dependent DNA helicase activity; GO:0004003 DNA damage checkpoint; GO:0000077

DNA repair; GO:0006281

cell cycle checkpoint; GO:0000075

female meiosis; GO:0007143

female meiosis chromosome segregation; GO:0016321

imaginal disc development; GO:0007444

meiotic recombination; GO:0007131

mitotic checkpoint; GO:0007093

regulation of progression through syncytial blastoderm mitotic cell cycle; GO:0007348

response to DNA damage stimulus; GO:0006974

response to radiation; GO:0009314

*CG3766* *scat* 7 15 29 8 0.00074 Golgi apparatus; GO:0005794 nucleic acid binding; GO:0003676 Golgi to vacuole transport; GO:0006896

mitochondrion; GO:0005739 carrier activity; GO:0005386 proteolysis; GO:0006508

nucleus; GO:0005634 zinc ion binding; GO:0008270 retrograde transport, endosome to Golgi;

GO:0042147

sperm individualization; GO:0007291

spermatid development; GO:0007286

*CG7869* *SuUR* 10 26 34 19 0.0011 centric heterochromatin; chromatin binding; GO:0003682 DNA endoreduplication; GO:0042023

GO:0005721 ATP binding; GO:0005524 DNA replication; GO:0006260

chromosome, pericentric region; chromatin assembly or disassembly; GO:0006333

GO:0000775 negative regulation of DNA replication;

heterochromatin; GO:0000792 GO:0008156

intercalary heterochromatin; GO:0005725 negative regulation of DNA replication;

nuclear telomeric heterochromatin; GO:0005724 GO:0008156

polytene chromosome; GO:0005700

*CG7704* *Taf5* 6 6 44 3 0.0013 SAGA complex; GO:0000124 general RNA polymerase II transcription factor activity; regulation of transcription, DNA-dependent; nucleus; GO:0005634 GO:0016251 GO:0006355

transcription initiation from RNA polymerase II

promoter; GO:0006367
