# Supplementary material for: Population Genomics: Whole-Genome Analysis of Polymorphism and Divergence in Drosophila simulans
Source: PLOS journal article supplement (doi:10.1371/journal.pbio.0050310), 2007-10-30
Supplement: S24 (10.1371/journal.pbio.0050310.s024) [file journal.pbio.0050310.s024]

Table S24. Genes associated with the most-significant intron MK tests (average coverage per site > 2)

Intron Synonymous

_________ _________

Gene Name Poly Fix Poly Fix FET p-value Cell. Compo. Mol. Function Biol. Process

_______ ______ ___ ___ ___ ___ __________ ___________________________ ______________________________________________ _______________________________________

*CG8834*  5 11 81 7 4.3e-7 ligase activity; GO:0016874 metabolism; GO:0008152

4-coumarate-CoA ligase activity; GO:0016207

ligase activity; GO:0016874

*CG3327* *E23*  196 172 39 4 2.5e-6 ATP-binding cassette (ABC) ATP binding; GO:0005524 anion transport; GO:0006820

transporter complex; GO:0043190 transporter activity; GO:0005215 lipid metabolism; GO:0006629

anion channel activity; GO:0005253 lipid transport; GO:0006869

ATPase activity, coupled to transmembrane movement of

substances; GO:0042626

nucleotide binding; GO:0000166

*CG9007*  13 24 116 35 2.6e-6 DNA binding; GO:0003677 regulation of transcription, DNA-dependent;

GO:0006355

*CG9623* *if*  286 360 49 18 5.7e-6 contractile fiber; GO:0043292 protein binding; GO:0005515 apposition of dorsal and ventral wing surfaces;

integrin complex; GO:0008305 receptor activity; GO:0004872 GO:0007475

cell adhesion molecule binding; GO:0050839 axon guidance; GO:0007411

protein binding; GO:0005515 cell adhesion; GO:0007155

cell migration; GO:0016477

cell-cell adhesion; GO:0016337

cell-matrix adhesion; GO:0007160

heterophilic cell adhesion; GO:0007157

maintenance of protein localization; GO:0045185

midgut development; GO:0007494

muscle attachment; GO:0016203

myofibril assembly; GO:0030239

regulation of cell shape; GO:0008360

salivary gland development; GO:0007431

tracheal epithelial cell migration (sensu Insecta);

GO:0007427

tracheal outgrowth (sensu Insecta); GO:0007426

wing morphogenesis; GO:0007476

*CG4314* *st*  19 21 41 4 1.1e-5 ATP-binding cassette (ABC) ATP binding; GO:0005524 eye pigment biosynthesis; GO:0006726

transporter complex; GO:0043190 eye pigment precursor transporter activity; GO:0005395 eye pigment precursor transport; GO:0006856

integral to plasma membrane; ATPase activity, coupled to transmembrane movement of ommochrome biosynthesis; GO:0006727

GO:0005887 substances; GO:0042626

nucleotide binding; GO:0000166

permease activity; GO:0015646

nucleotide binding; GO:0000166

*CG33957* *cp309* 241 92 149 18 1.9e-5 centrosome; GO0005813 structural constituent of cytoskeleton;GO000520 cytoskeleton organization and

biogenesis;GO0007010

microtubule nucleation;GO0007020

*CG10363* *TepIV* 38 68 41 16 1.5e-5 sugar porter activity; GO:0005351 antibacterial humoral response (sensu

protease inhibitor activity; GO:0030414 Protostomia); GO:0006961

endopeptidase inhibitor activity; GO:0004866 phosphoenolpyruvate-dependent sugar

phosphotransferase system; GO:0009401

*CG4832* *cnn* 21 34 47 13 1.3e-5 centrosome; GO:0005813 microtubule binding; GO:0008017 central nervous system development; GO:0007417

cytoplasm; GO:0005737 ATPase activity, coupled; GO:0042623 centrosome cycle; GO:0007098

microtubule associated complex; female meiosis chromosome segregation;

GO:0005875 GO:0016321

microtubule cytoskeleton organization and biogenesis; GO:0000226

microtubule-based process; GO:0007017

midgut development; GO:0007494

mitotic spindle organization and biogenesis; GO:0007052

nuclear division; GO:0000280

peripheral nervous system development; GO:0007422

*CG32592* *hiw* 304 394 120 78 2.6e-5 cytoplasmic membrane-bound ubiquitin-protein ligase activity; GO:0004842 BMP signaling pathway; GO:0030509

vesicle; GO:0016023 protein binding; GO:0005515 adult walking behavior; GO:0007628

plasma membrane; GO:0005886 zinc ion binding; GO:0008270 locomotion; GO:0040011

ubiquitin ligase complex; negative regulation of BMP signaling pathway; GO:0000151 GO:0030514

negative regulation of synaptic growth at neuromuscular junction; GO:0045886

protein ubiquitination; GO:0016567

regulation of synaptic growth at neuromuscular junction; GO:0008582

*CG8112* 8 19 25 4 2.7e-5 sterol O-acyltransferase activity; GO:0004772 cholesterol metabolism; GO:0008203
