# Supplementary material for: Population Genomics: Whole-Genome Analysis of Polymorphism and Divergence in Drosophila simulans
Source: PLOS journal article supplement (doi:10.1371/journal.pbio.0050310), 2007-10-30
Supplement: S25 (10.1371/journal.pbio.0050310.s025) [file journal.pbio.0050310.s025]

Table S25. Number (frequency) of non-synonymous and non-coding polymorphisms (sites with coverage of n = 5 or n = 6 *D. simulans* alleles) for different frequency classes.

Coverage class 5

Nonsynonymous Intron + intergenic X chromosome

1 313 (0.65) 17249 (0.58)

2 79 (0.17) 5640 (0.19)

3 48 (0.10) 3777 (0.13)

4 38 (0.08) 3221 (0.11)

2 = 12.3 (df = 3), p = 0.0064

Nonsynonymous Intron + intergenic Autosomes

1 4338 (0.66) 191539 (0.61)

2 1194 (0.18) 59840 (0.19)

3 590 (0.09) 32659 (0.10)

4 462 (0.07) 27461 (0.09)

2 = 62.2 (df = 3), p = 0.0000

Coverage class 6

Nonsynonymous Intron + intergenic X chromosome

1 65 (0.61) 4789 (0.55)

2 21 (0.20) 1478 (0.17)

3 3 (0.03) 954 (0.11)

4 8 (0.08) 719 (0.08)

5 9 (0.08) 731 (0.08)

2 = 7.66 (df = 4), p = 0.11

Nonsynonymous Intron + intergenic Autosomes

1 1466 (0.62) 70325 (0.58)

2 414 (0.18) 21824 (0.18)

3 214 (0.09) 11569 (0.10)

4 147 (0.06) 8202 (0.07)

5 122 (0.05) 8433 (0.07)

2 = 18.89 (df = 4), p = 0.0008
