# Supplementary material for: Population Genomics: Whole-Genome Analysis of Polymorphism and Divergence in Drosophila simulans
Source: PLOS journal article supplement (doi:10.1371/journal.pbio.0050310), 2007-10-30
Supplement: S27 (10.1371/journal.pbio.0050310.s027) [file journal.pbio.0050310.s027]

Table S27. X and A, polymorphic and fixed, preferred and unpreferred variants for sites with coverage four, five or six.

Coverage four

X 2

Poly Fixed

Pref 944 1385

Unpref 2228 1843 119.4

A

Poly Fixed

Pref 8546 6535

Unpref 24379 9068 1253.7

Coverage five

X

Poly Fixed

Pref 582 710

Unpref 1434 894 92.2

A

Poly Fixed

Pref 8007 5062

Unpref 22967 6947 1086.7

Coverage six

X

Poly Fixed

Pref 137 143

Unpref 369 201 19.5

A

Poly Fixed

Pref 2872 1574

Unpref 8376 2203 353.5

All 2 x 2 tables are p < 0.0001
