# Supplementary material for: Population Genomics: Whole-Genome Analysis of Polymorphism and Divergence in Drosophila simulans
Source: PLOS journal article supplement (doi:10.1371/journal.pbio.0050310), 2007-10-30
Supplement: S28 (10.1371/journal.pbio.0050310.s028) [file journal.pbio.0050310.s028]

Table S28. Unpreferred polymorphisms (coverage five sites) occur at lower frequency than preferred polymorphisms

X

Unpref Pref

1 978 (0.68) 295 (0.51)

2 224 (0.16) 124 (0.21)

3 132 (0.09) 75 (0.13)

4 100 (0.07) 88 (0.15)

2 = 62.8, df = 3, p < 0.0001

A

1 14684 (0.64) 4205 (0.53)

2 4469 (0.19) 1711 (0.21)

3 2312 (0.10) 1126 (0.14)

4 1502 (0.07) 965 (0.12)

2 = 449.7, df = 3, p < 0.0001
