# Supplementary material for: Population Genomics: Whole-Genome Analysis of Polymorphism and Divergence in Drosophila simulans
Source: PLOS journal article supplement (doi:10.1371/journal.pbio.0050310), 2007-10-30
Supplement: S34 (10.1371/journal.pbio.0050310.s034) [file journal.pbio.0050310.s034]

**Table S34. Correlation (Kendall’s t) between copy numbers of TE families in “trimmed” euchromatic regions of *D. simulans* and *melanogaster*.**

The *simulans* TEs are the “clustered” TEs. The *melanogaster* TEs are those annotated in release 4.0.

________________________________________________________________

TE class t p-value n z

LTR 0.224 0.015 64 5.59

non-LTR 0.506 4x10-5 40 4.16

IR 0.558 6x10-4 24 3.44

FB N/A N/A 2 N/A

________________________________________________________________

Pooled 0.359 3x10-8 130 5.59

________________________________________________________________
