# Supplementary material for: Population Genomics: Whole-Genome Analysis of Polymorphism and Divergence in Drosophila simulans
Source: PLOS journal article supplement (doi:10.1371/journal.pbio.0050310), 2007-10-30
Supplement: S35 (10.1371/journal.pbio.0050310.s035) [file journal.pbio.0050310.s035]

**Table S35. Tests of the homogeneity of the proportions of each family across six *D. simulans* lines, homogeneity of classes across lines and homogeneity of families within classes across lines.** __________________________________________________________________________

Number **2 Prob. <

All families 126 675.7 0.07

All classes 6 50.6 0.0015

Families within LTR 64 299.1 0.74

Families within non-LTR 39 184.8 0.60

Families within IR 19 122.8 0.01

Families within FB 2 9.8 0.06

___________________________________________________________________________
