# Supplementary material for: Population Genomics: Whole-Genome Analysis of Polymorphism and Divergence in Drosophila simulans
Source: PLOS journal article supplement (doi:10.1371/journal.pbio.0050310), 2007-10-30
Supplement: S36 (10.1371/journal.pbio.0050310.s036) [file journal.pbio.0050310.s036]

**Table S36. Test of the homogeneity of relative family copy numbers across the five chromosome arms (pooled across lines) for all TEs and within the four classes.**

___________________________________________________________________________

Number **2 Prob. <

All families 126 671.8 0.0001

All classes 6 33.5 0.03

Families within LTR 64 274.8 0.14

Families within non-LTR 39 248.3 0.0001

Families within IR 19 113.9 0.0005

Families within FB 2 6.2 0.15

___________________________________________________________________________
